# Supplementary material for: Cysteamine hydrochloride protected carbon dots as a vehicle for the efficient release of the anti-schizophrenic drug haloperidol
Source: Royal Society of Chemistry journal article supplement (doi:10.1039/c3ra42139b), 2013-01-01
Supplement: c3ra42139b.pdf [file c3ra42139b.pdf]

## Electronic Supplementary Information

### **Cysteamine hydrochloride protected Carbon dots as molecular armadas for efficient release of Anti-Schizophrenic drug haloperidol**

Sunil Pandey<sup>§,\*</sup>, Ashmi Mewada<sup>§</sup>, Mukeshchand Thakur<sup>§</sup>, Arun Tank and  
Madhuri Sharon

\* N.S.N. Research Center for Nanotechnology and Bionanotechnology,  
Ambernath, MS, India.

Email: [gurus.spandey@gmail.com](mailto:gurus.spandey@gmail.com), Phone: (+91) 9004024937

<sup>§</sup>Authors have equal contribution in this work.

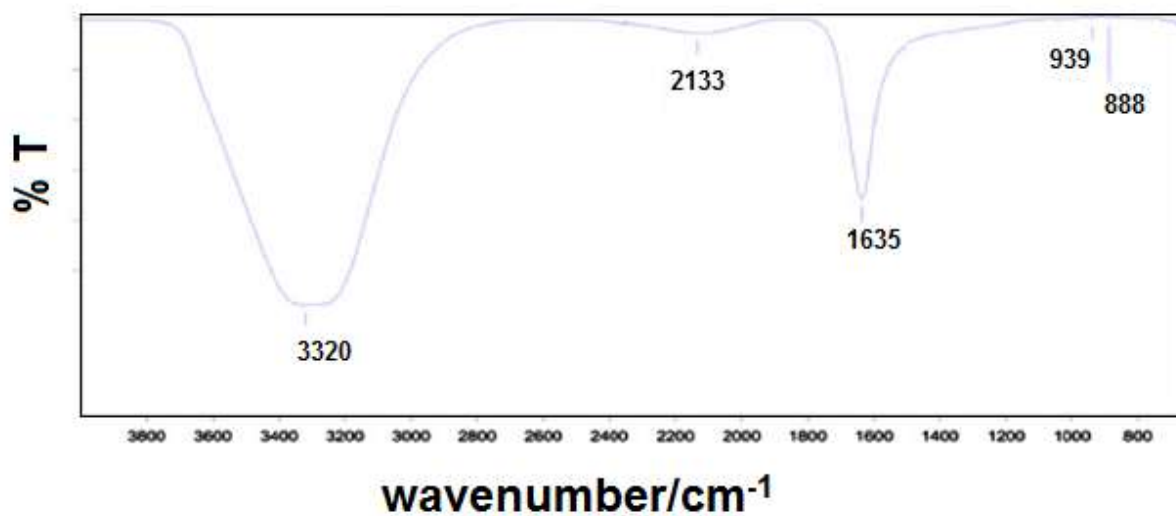

Figure S1 Fourier Transform Infrared spectra of bare cysteamine Hydrochloride (Cys-HCl). Feeble bands at 888  $\text{cm}^{-1}$  and 939  $\text{cm}^{-1}$  refer to alkane  $\text{CH}_2$  bending and amine C-H bending. Prominent bands at 1635  $\text{cm}^{-1}$  and 2133  $\text{cm}^{-1}$  depict amide NH bend and mercaptan  $-\text{SH}$  stretch respectively arising out of the structure of Cysteamine. Wide band at 3320  $\text{cm}^{-1}$  is because of aqueous counterpart due to  $-\text{OH}$  stretchings.
